# Supplementary material for: Statistical learning shapes pain perception and prediction independently of external cues
Source: bioRxiv or medRxiv preprint supplement (doi:10.1101/2023.03.23.23287656), 2024-03-29
Supplement: Supplementary file [file media-1.pdf]

# Supplementary information - Statistical learning in acute and chronic pain

Jakub Onysk<sup>1,2,1</sup>, Mia Whitefield<sup>1,1</sup>, Nicholas Gregory<sup>1</sup>, Maeghal Jain<sup>1</sup>, Georgia Turner<sup>1,3</sup>, Ben Seymour<sup>4,5</sup>, and Flavia Mancini<sup>1</sup>

<sup>1</sup>Computational and Biological Learning Unit, Department of Engineering, University of Cambridge, Cambridge CB2 1PZ, UK

<sup>2</sup>Applied Computational Psychiatry Lab, Max Planck Centre for Computational Psychiatry and Ageing Research, Queen Square Institute of Neurology and Mental Health Neuroscience Department, Division of Psychiatry, University College London, UK

<sup>3</sup>MRC Cognition and Brain Sciences Unit, University of Cambridge, UK

<sup>4</sup>Wellcome Centre for Integrative Neuroimaging, John Radcliffe Hospital, Headington, Oxford OX3 9DU, UK

<sup>5</sup>Center for Information and Neural Networks (CiNet), Osaka 565-0871, Japan

<sup>1</sup>Equal contribution

March 23, 2023

## 1 Supplementary information to Experiment 1

### 1.1 Behavioural results

#### 1.1.1 Model-naive performance

For each sequence condition (Volatility  $\times$  Stochasticity), we calculated the root mean squared error (RMSE) of participants responses (Type: perception and prediction ratings) and compared to the normative noxious input, as a measure of performance in the task. We analysed the RMSEs with a repeated measures ANOVA, with the results reported in Supplementary Table 1.

Given the significant interaction between stochasticity and response type, we further ran a post hoc comparison tests for this effect, as reported in Supplementary Table 2.

Supplementary Table 1: Within subjects effects from repeated measures ANOVA of participant RMSE scores with stochasticity, volatility and response type factors. SS - Sum of Squares, MS - Mean Square.

| Effect                                             | SS      | df | MS      | F            | p               | $\eta^2$     | $\eta_p^2$   |
|----------------------------------------------------|---------|----|---------|--------------|-----------------|--------------|--------------|
| Volatility                                         | 10.714  | 1  | 10.714  | 0.960        | 0.336           | 0.007        | 0.036        |
| Residuals                                          | 290.166 | 26 | 11.160  |              |                 |              |              |
| Stochasticity                                      | 113.964 | 1  | 113.964 | 19.939       | < <b>0.001*</b> | 0.074        | 0.434        |
| Residuals                                          | 148.603 | 26 | 5.715   |              |                 |              |              |
| Type                                               | 365.000 | 1  | 365.000 | 85.109       | < <b>0.001*</b> | 0.237        | 0.766        |
| Residuals                                          | 111.503 | 26 | 4.289   |              |                 |              |              |
| Volatility $\times$ Stochasticity                  | 0.006   | 1  | 0.006   | $5.688e - 4$ | 0.981           | $3.723e - 6$ | $2.188e - 5$ |
| Residuals                                          | 261.912 | 26 | 10.074  |              |                 |              |              |
| Volatility $\times$ Type                           | 7.313   | 1  | 7.313   | 3.196        | 0.085           | 0.005        | 0.109        |
| Residuals                                          | 59.487  | 26 | 2.288   |              |                 |              |              |
| Stochasticity $\times$ Type                        | 63.662  | 1  | 63.662  | 29.842       | < <b>0.001*</b> | 0.041        | 0.534        |
| Residuals                                          | 55.466  | 26 | 2.133   |              |                 |              |              |
| Volatility $\times$ Stochasticity<br>$\times$ Type | 1.356   | 1  | 1.356   | 0.704        | 0.409           | $8.807e - 4$ | 0.026        |
| Residuals                                          | 50.060  | 26 | 1.925   |              |                 |              |              |

Supplementary Table 2: Post Hoc Comparisons for the repeated measures ANOVA's interaction effect of Stochasticity  $\times$  Type.

|                  |                  | Mean Diff. | 95% CI for Mean Diff. |        | SE    | t       | $p_{bonf}$      |
|------------------|------------------|------------|-----------------------|--------|-------|---------|-----------------|
|                  |                  |            | Lower                 | Upper  |       |         |                 |
| High, Perception | Low, Perception  | 0.367      | -0.687                | 1.421  | 0.381 | 0.963   | 1.000           |
|                  | High, Prediction | -3.686     | -4.636                | -2.735 | 0.345 | -10.688 | < <b>0.001*</b> |
|                  | Low, Prediction  | -1.147     | -2.329                | 0.034  | 0.430 | -2.665  | 0.062           |
| Low, Perception  | High, Prediction | -4.053     | -5.234                | -2.871 | 0.430 | -9.415  | < <b>0.001*</b> |
|                  | Low, Prediction  | -1.514     | -2.464                | -0.564 | 0.345 | -4.390  | < <b>0.001*</b> |
| High, Prediction | Low, Prediction  | 2.539      | 1.484                 | 3.593  | 0.381 | 6.658   | < <b>0.001*</b> |

## 1.2 Noxious inputs and responses

### 1.2.1 Input transformation

We linearly transformed participants' responses to project them from the 1-13 range to 0-100 using a linear transformation we obtained from a regression of stimulus intensities onto pain ratings. Plots of each participant's transformation can be found in Supplementary Fig. 1. The sequences of transformed noxious stimuli provided to each participant are plotted in Supplementary Fig. 2. The condition sequences are concatenated in the order as they were delivered.

### 1.2.2 Responses

We superimposed participants responses (perception and prediction ratings) onto the noxious input condition sequences in Supplementary Fig. 3.

Finally, we plotted participants' confidence ratings throughout the task in Supplementary Fig. 4.

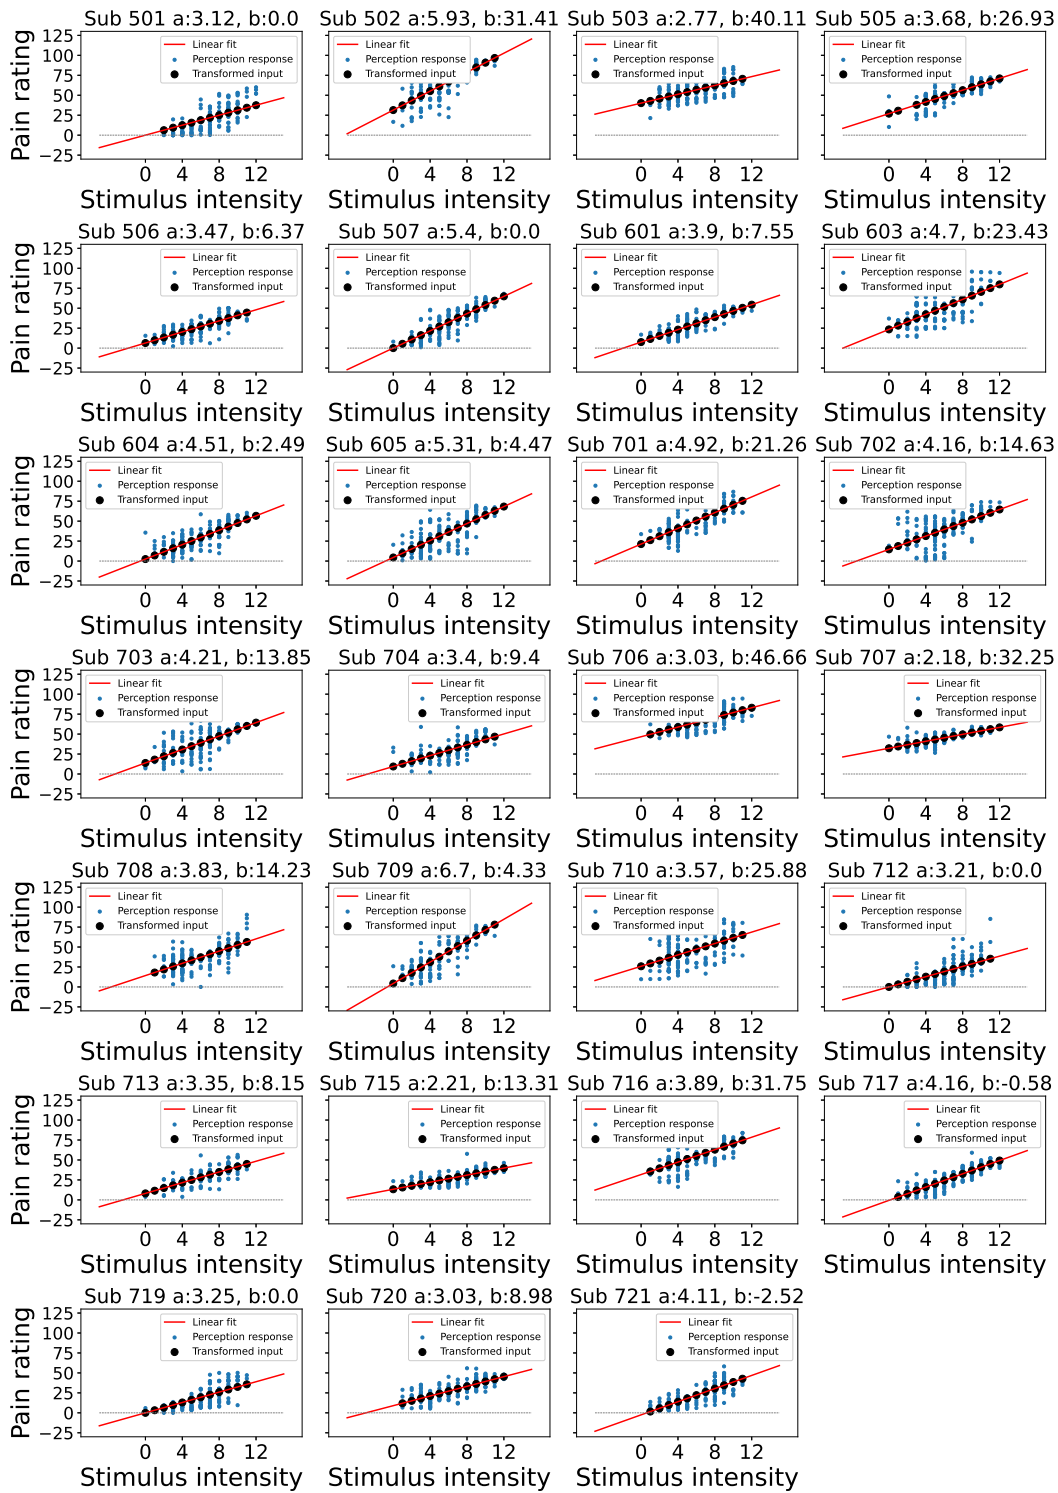

Supplementary Fig. 1: Linear transformation of the input at perception trials. Blue dots indicate participant's perception responses for a given level of stimulus intensity, black dots indicate transformed intensity values, a linear least squares regression was performed to achieve the best fitting line through participant responses as shown in red, the intercept was constrained  $> 0$ .

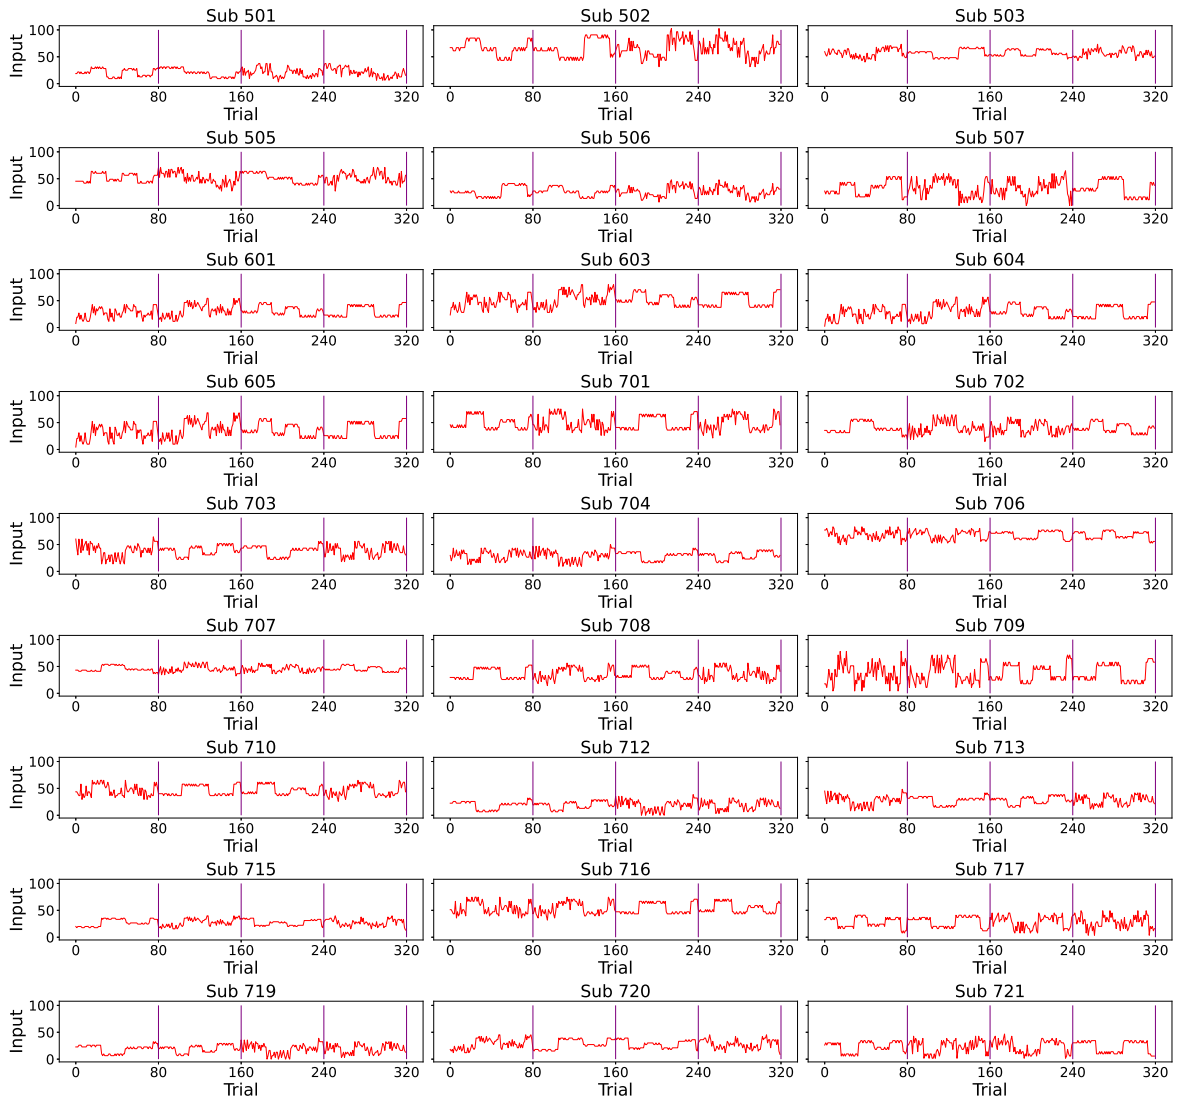

Supplementary Fig. 2: Sequences of noxious inputs for each participant. Vertical purple lines mark the end of each condition.

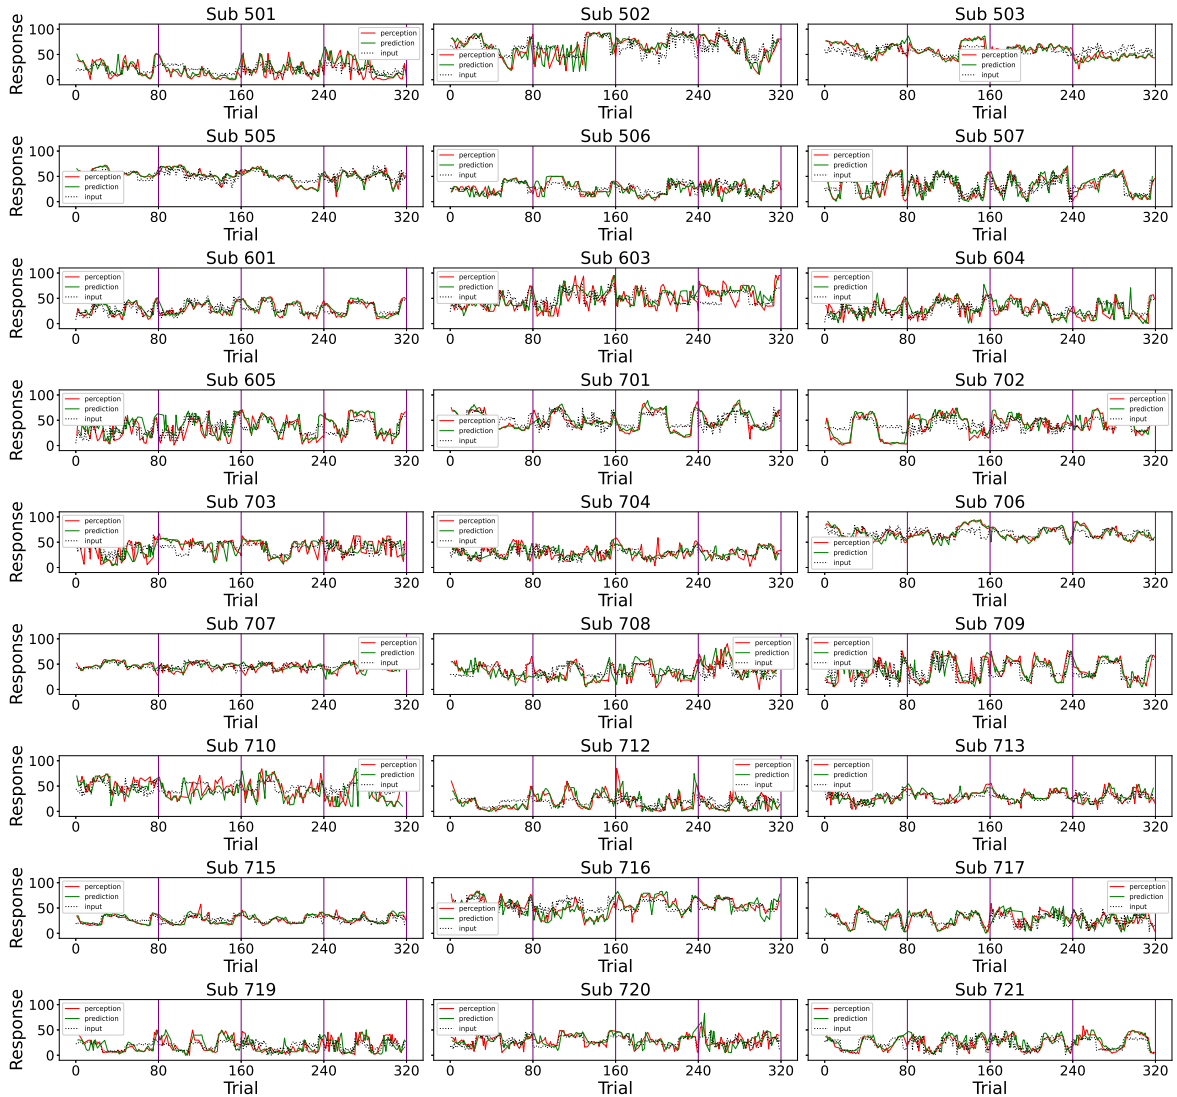

Supplementary Fig. 3: Participants responses (red - perception; green - prediction) to the noxious input (dotted line) sequences. Vertical purple lines mark the end of each condition.

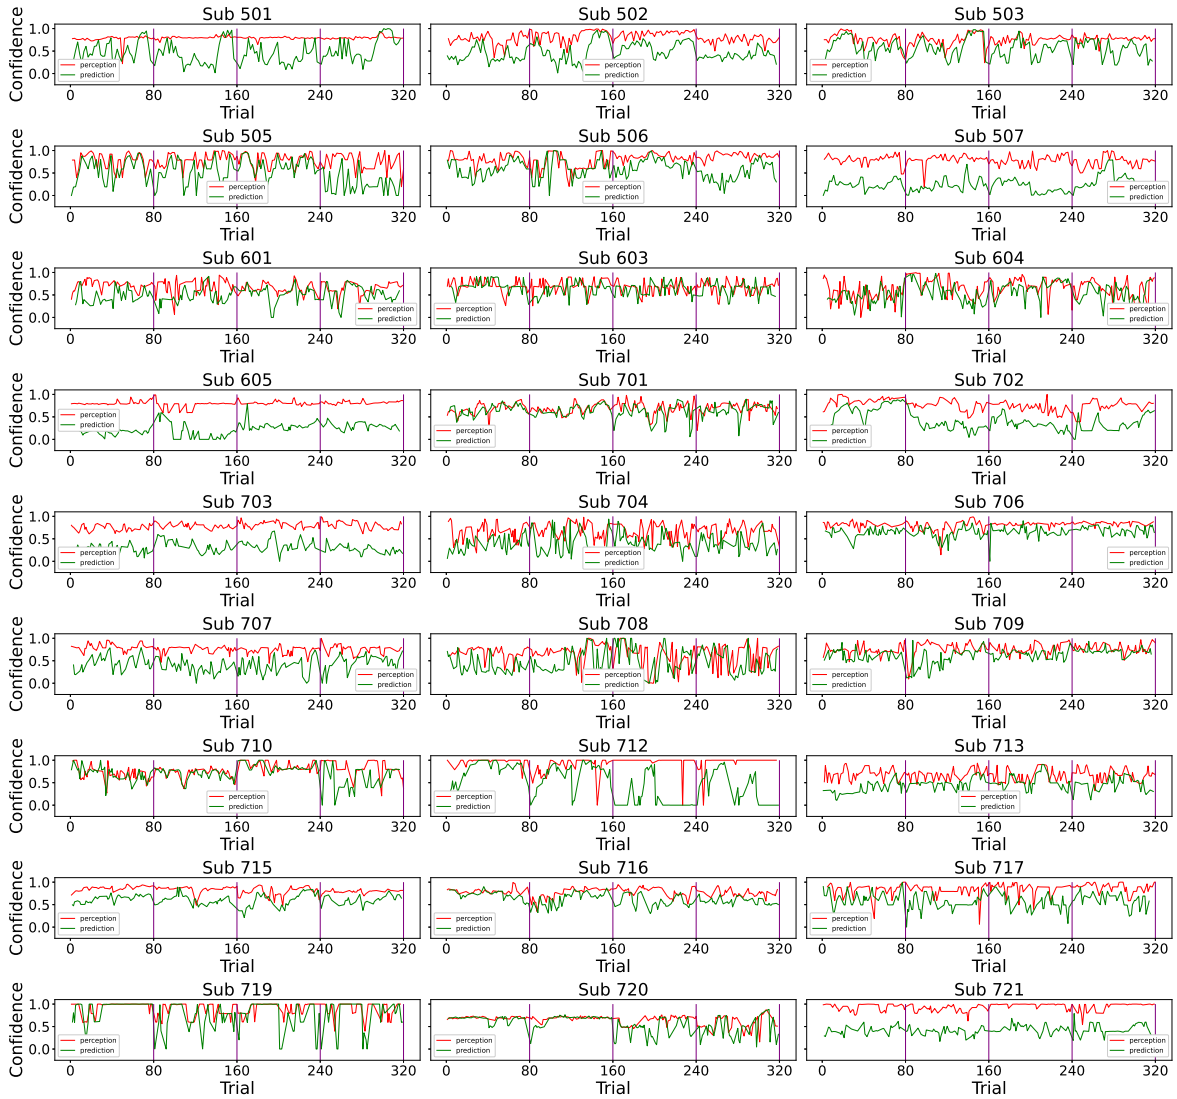

Supplementary Fig. 4: Participants' confidence ratings in (red - perception; green - prediction) during the task. Vertical purple lines mark the end of each condition.

### 1.3 Model predictions

Following the model fitting procedure, in Supplementary Fig. 5 we plotted example model predicted ratings both for perception and prediction responses for each condition as compared with noxious input for one participant's responses.

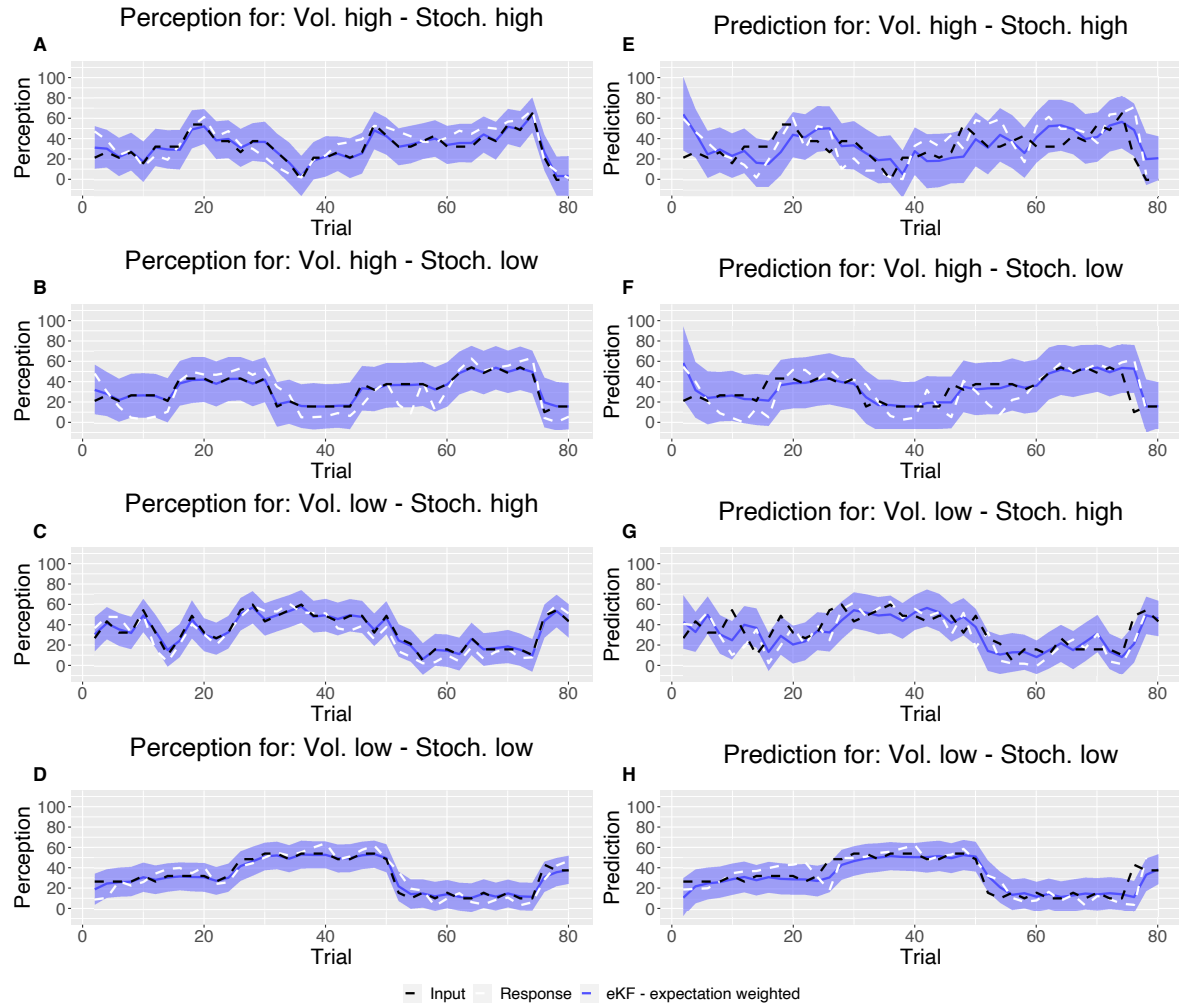

Supplementary Fig. 5: Example plot of the input sequences (black) for each condition, one participant's responses (white) and the winning, eKF, model predictions (blue) including 95% confidence intervals (shaded blue) for **A-D**: Perception and **E-H**: Prediction.

Lastly, for each condition and for each participant we plotted model responses (perception and prediction) against participant responses in Supplementary Fig. 6. The grand mean correlation across participants, for each condition and response type was calculated and included in the figure.



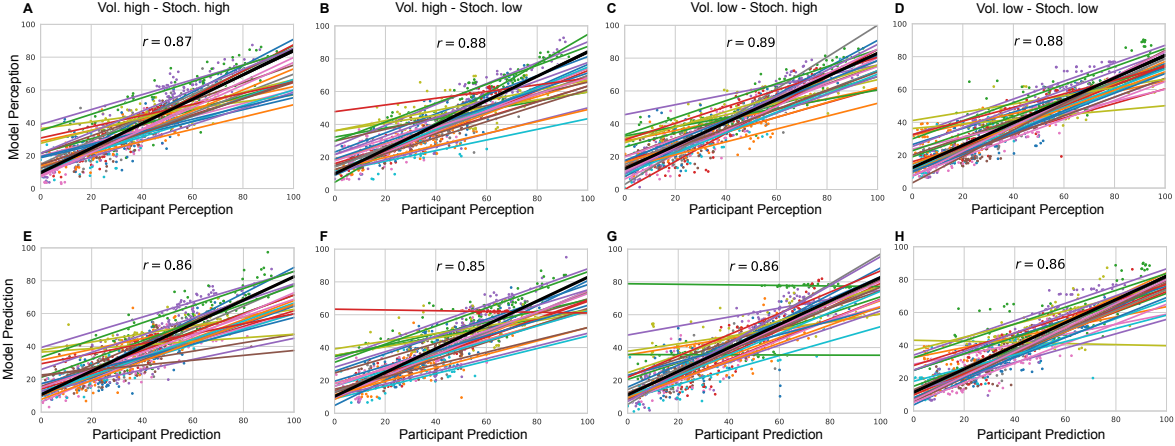

Supplementary Fig. 6: Model responses against participants responses for each condition and each response type **A-D**: Perception and **E-H**: Prediction. The annotated value is the grand mean correlation across subjects for each condition and response type.

## 1.4 Parameter recovery

The results of parameter recovery analysis for each parameter for each model are reported in Supplementary Table 3-7. We recovered each parameter 50 times and calculated the mean and SD of the correlation between the true and recovered parameter values.

Supplementary Table 3: Pearson correlation coefficient  $r$  (SD) from the parameter recovery analysis from each model for the eRL

|        | $\alpha$      | $\gamma$      | $\xi$         | $E^0$         | $C$           |
|--------|---------------|---------------|---------------|---------------|---------------|
| r (SD) | 0.673 (0.122) | 0.918 (0.052) | 0.992 (0.005) | 0.726 (0.105) | 0.466 (0.141) |

Supplementary Table 4: Pearson correlation coefficient  $r$  (SD) from the parameter recovery analysis from each model for the RL

|        | $\alpha$     | $\xi$         | $E^0$        | $C$           |
|--------|--------------|---------------|--------------|---------------|
| r (SD) | 0.864 (0.06) | 0.993 (0.004) | 0.63 (0.113) | 0.461 (0.127) |

Supplementary Table 5: Pearson correlation coefficient  $r$  (SD) from the parameter recovery analysis from each model for the eKF

|        | $\epsilon$    | $s$           | $v$           | $\xi$         | $E^0$         | $w^0$         | $C$           |
|--------|---------------|---------------|---------------|---------------|---------------|---------------|---------------|
| r (SD) | 0.748 (0.166) | 0.534 (0.172) | 0.727 (0.159) | 0.974 (0.141) | 0.841 (0.138) | 0.285 (0.165) | 0.455 (0.163) |

Supplementary Table 6: Pearson correlation coefficient  $r$  (SD) from the parameter recovery analysis from each model for the KF

|        | $s$           | $v$           | $\xi$         | $E^0$         | $w^0$        | $C$           |
|--------|---------------|---------------|---------------|---------------|--------------|---------------|
| r (SD) | 0.612 (0.125) | 0.595 (0.115) | 0.993 (0.005) | 0.568 (0.185) | 0.29 (0.197) | 0.447 (0.145) |

Moreover, to assess the number of simulations needed, we calculated the average SD (and its error) as a function of increasing number of simulation, as plotted in Supplementary Fig. 7. The average was obtained from the 500 randomly chosen permutations of different simulations at each  $n$  (out of 50).

Supplementary Table 7: Pearson correlation coefficient  $r$  (SD) from the parameter recovery analysis from each model for the Random model

|          | $\xi$         | $R$           | $C$           |
|----------|---------------|---------------|---------------|
| $r$ (SD) | 0.996 (0.005) | 0.999 (0.001) | 0.085 (0.211) |

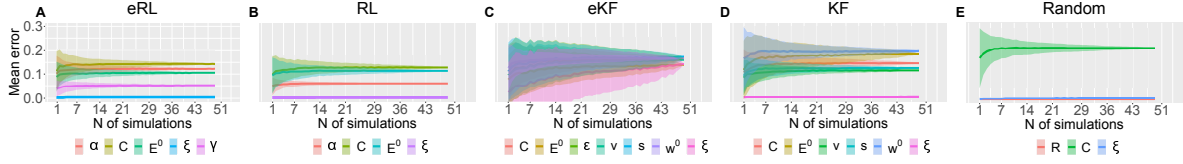

Supplementary Fig. 7: **Parameter recovery average SD for each model.** The average SD is plotted as a function of simulation number averaged across 500 permutations of 50 simulations.

## 1.5 Model recovery

We also ran model recovery analysis as described in the Methods. We report the confusion matrix of our analysis based on 50 simulations in Supplementary Table 8.

Supplementary Table 8: Confusion matrix from the model recovery analysis based on 50 simulations. The y-axis indicates which model simulated the dataset, while the x-axis indicates which model fit the data based on LOOIC.

|           |        | eRL   | RL    | eKF   | KF    | Random |
|-----------|--------|-------|-------|-------|-------|--------|
| Simulated | eRL    | 0.400 | 0.180 | 0.340 | 0.080 | 0.000  |
|           | RL     | 0.160 | 0.340 | 0.220 | 0.280 | 0.000  |
|           | eKF    | 0.440 | 0.060 | 0.440 | 0.060 | 0.000  |
|           | KF     | 0.280 | 0.160 | 0.280 | 0.280 | 0.000  |
|           | Random | 0.340 | 0.000 | 0.280 | 0.000 | 0.380  |
|           |        | Fit   |       |       |       |        |

## 1.6 Condition-wise model comparison

For each condition, we ran model comparison procedure as described in the Methods. The results are reported in Supplementary Table 9. In each condition, the expectation weighted models provided significantly better fit than models without this element.

Supplementary Table 9: Model comparison results for each condition.

| Condition                | Model name                 | ELPD difference | SE difference | Sigma effect | LOOIC     |
|--------------------------|----------------------------|-----------------|---------------|--------------|-----------|
| Vol. high<br>Stoch. high | eKF - expectation weighted | 0.000           | 0.000         |              | 15748.389 |
|                          | eRL - expectation weighted | -9.560          | 5.071         | 1.885        | 15767.509 |
|                          | RL                         | -139.407        | 61.362        | 2.272        | 16027.202 |
|                          | KF                         | -161.444        | 77.335        | 2.088        | 16071.277 |
|                          | Random response            | -730.600        | 77.009        | 9.487        | 17209.588 |
| Vol. high<br>Stoch. low  | eKF - expectation weighted | 0.000           | 0.000         |              | 15682.115 |
|                          | eRL - expectation weighted | -17.439         | 5.896         | 2.958        | 15716.993 |
|                          | RL                         | -131.817        | 35.936        | 3.668        | 15945.749 |
|                          | KF                         | -133.464        | 37.171        | 3.591        | 15949.042 |
|                          | Random response            | -824.346        | 79.148        | 10.415       | 17330.807 |
| Vol. low<br>Stoch. high  | eKF - expectation weighted | 0.000           | 0.000         |              | 15990.114 |
|                          | eRL - expectation weighted | -12.027         | 7.029         | 1.711        | 16014.169 |
|                          | RL                         | -149.338        | 43.874        | 3.404        | 16288.789 |
|                          | KF                         | -159.738        | 46.485        | 3.436        | 16309.590 |
|                          | Random response            | -831.096        | 84.549        | 9.830        | 17652.306 |
| Vol. low<br>Stoch. low   | eKF - expectation weighted | 0.000           | 0.000         |              | 15904.936 |
|                          | eRL - expectation weighted | -11.068         | 4.309         | 2.569        | 15927.072 |
|                          | RL                         | -70.588         | 16.643        | 4.241        | 16046.111 |
|                          | KF                         | -74.031         | 20.972        | 3.530        | 16052.997 |
|                          | Random response            | -901.792        | 107.244       | 8.409        | 17708.519 |

## 1.7 Modelling results

### 1.7.1 Group-level differences between each condition

We plotted the estimate posterior distributions for each parameter of the model (including the across-trial average and the final learning rate and perceptual weighting term) in Supplementary Fig. 8. We found no group-level differences between conditions for any of the posterior distribution of the parameters in the winning eKF model.

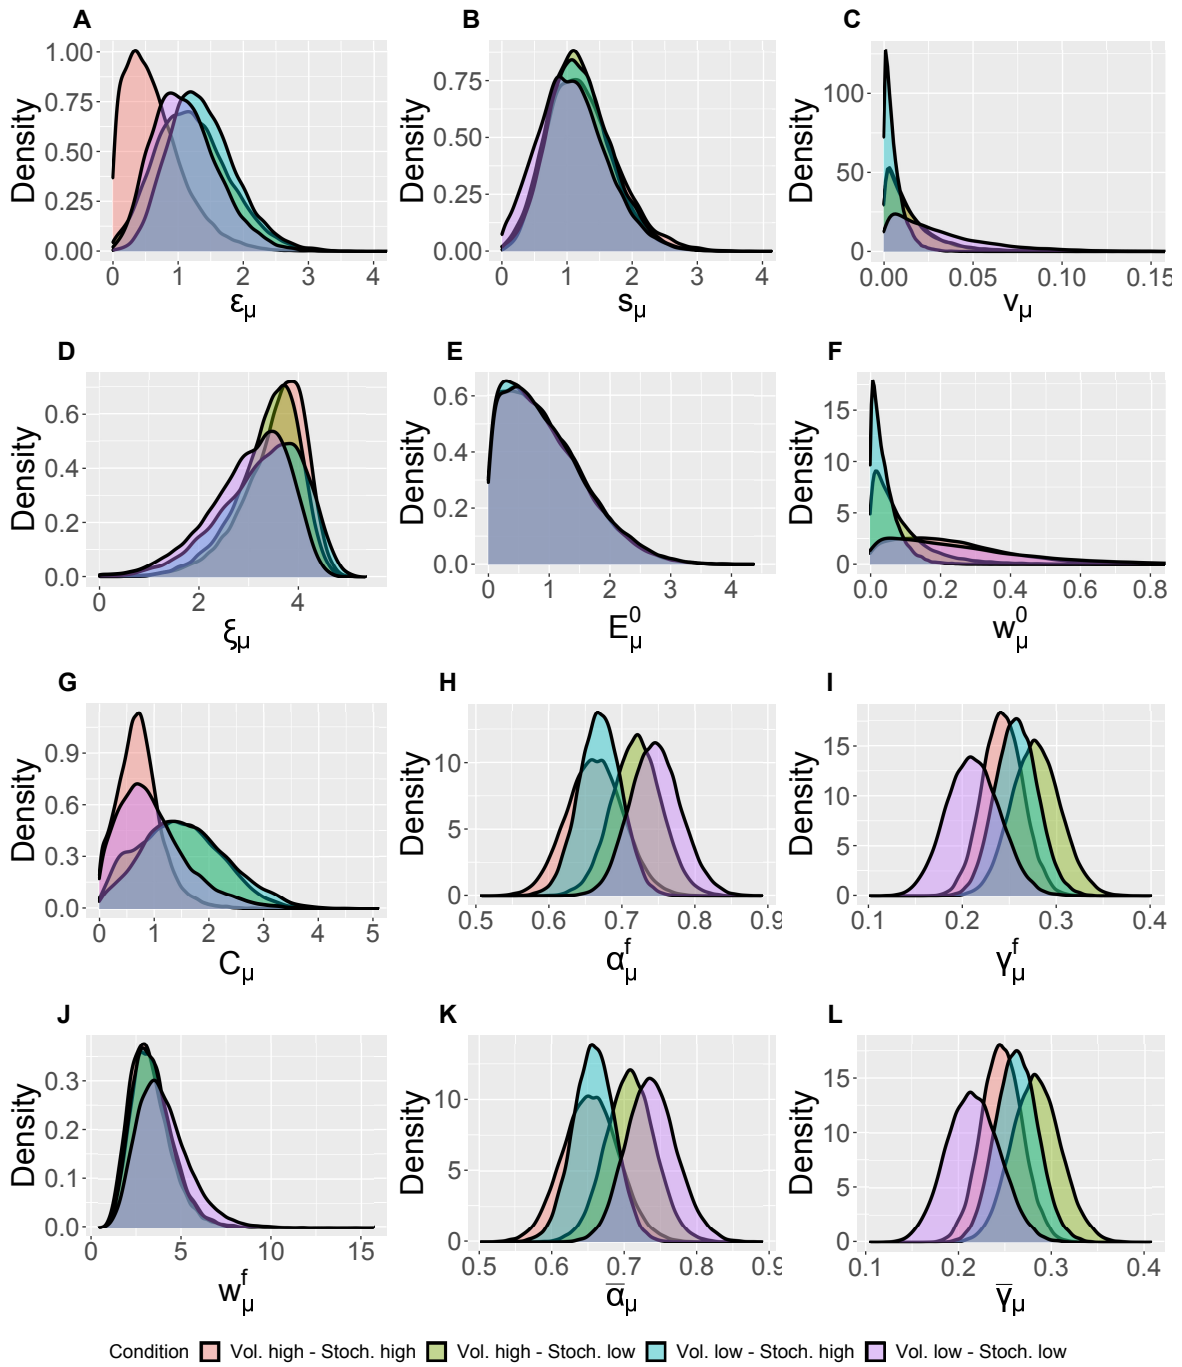

Supplementary Fig. 8: Group-level distributions for parameters for each condition for the eKF model.

### 1.7.2 Individual-level differences between conditions

We estimated the individual-level parameters for each condition, we include their violin plots in Supplementary Fig. 9.

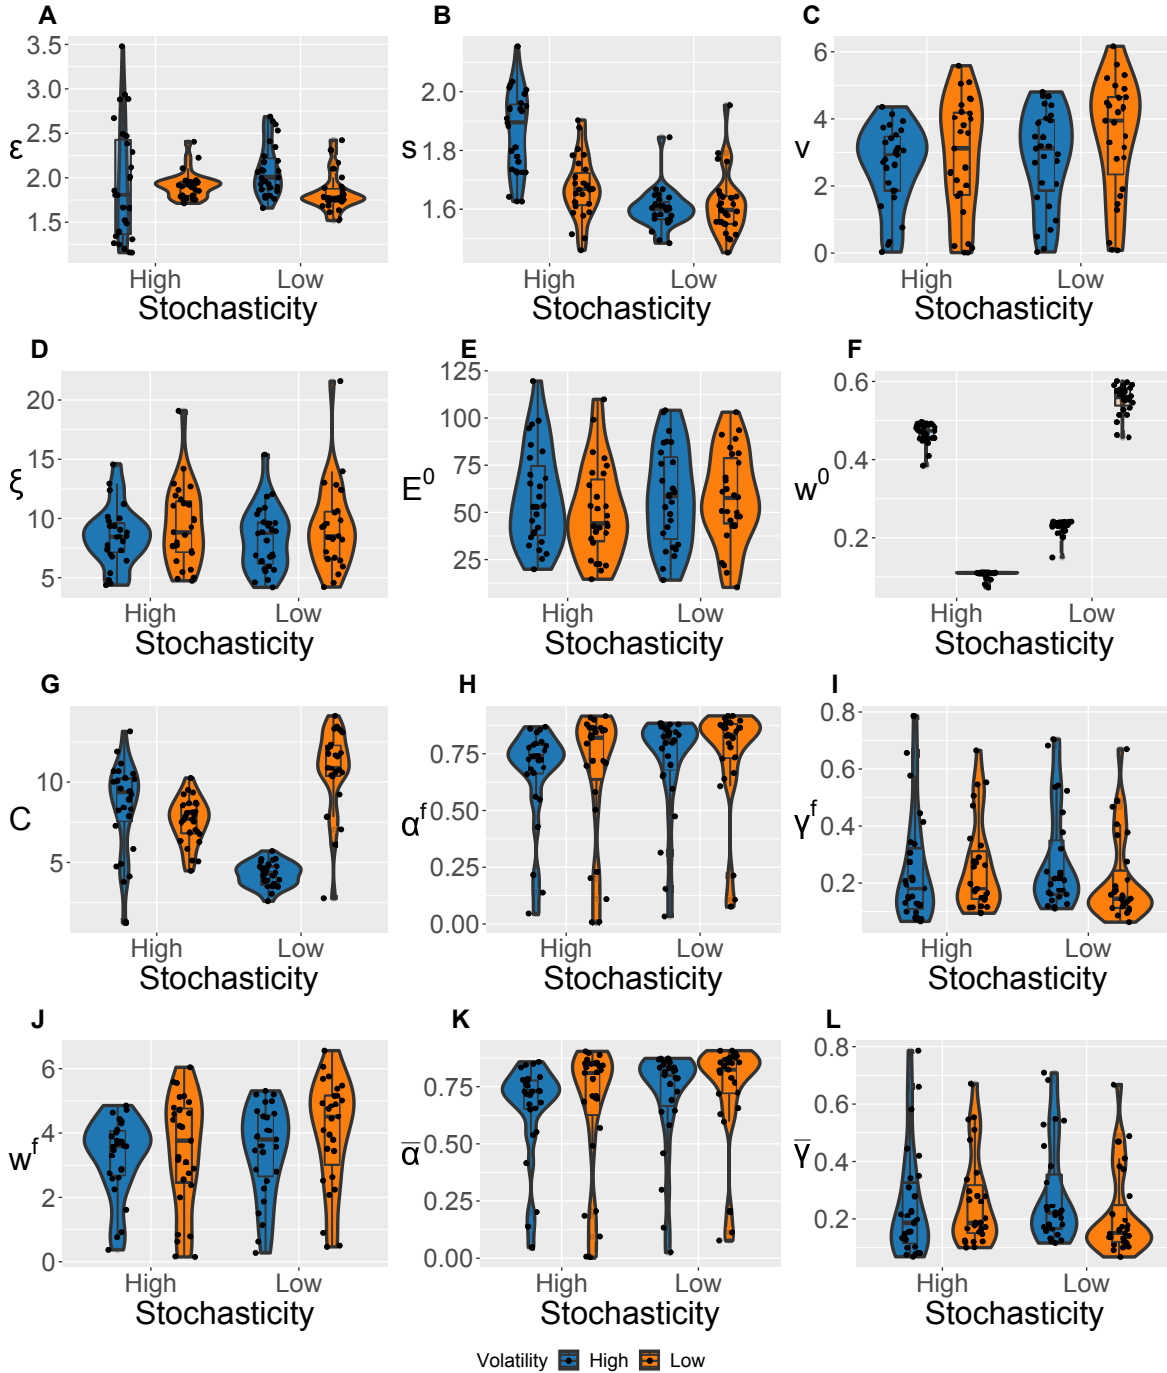

Supplementary Fig. 9: Violin plots (and box-plots) of individual-level parameters for each condition in the winning eKF model.

Furthermore, to detect individual-level parameter differences as we manipulated the level of stochasticity and volatility, we ran repeated-measures ANOVA. In case when there was interaction between

stochasticity and volatility effects, we followed up with post-hoc comparison tests. The results of the analyses are reported in Supplementary Table 10-24.

Supplementary Table 10: Within subjects effects from repeated-measures ANOVA for  $\epsilon$

| Effect                            | Sum of Squares | df | Mean Square | F     | p     | $\eta^2$ | $\eta_p^2$ |
|-----------------------------------|----------------|----|-------------|-------|-------|----------|------------|
| Volatility                        | 0.539          | 1  | 0.539       | 4.014 | 0.056 | 0.058    | 0.134      |
| Residuals                         | 3.492          | 26 | 0.134       |       |       |          |            |
| Stochasticity                     | 0.017          | 1  | 0.017       | 0.180 | 0.675 | 0.002    | 0.007      |
| Residuals                         | 2.505          | 26 | 0.096       |       |       |          |            |
| Volatility $\times$ Stochasticity | 0.349          | 1  | 0.349       | 3.758 | 0.063 | 0.037    | 0.126      |
| Residuals                         | 2.417          | 26 | 0.093       |       |       |          |            |

Supplementary Table 11: Within subjects effects from repeated-measures ANOVA for  $s$

| Effect                            | Sum of Squares | df | Mean Square | F      | p                | $\eta^2$ | $\eta_p^2$ |
|-----------------------------------|----------------|----|-------------|--------|------------------|----------|------------|
| Volatility                        | 0.214          | 1  | 0.214       | 25.246 | < <b>0.001</b> * | 0.111    | 0.493      |
| Residuals                         | 0.220          | 26 | 0.008       |        |                  |          |            |
| Stochasticity                     | 0.672          | 1  | 0.672       | 53.174 | < <b>0.001</b> * | 0.348    | 0.672      |
| Residuals                         | 0.329          | 26 | 0.013       |        |                  |          |            |
| Volatility $\times$ Stochasticity | 0.285          | 1  | 0.285       | 35.108 | < <b>0.001</b> * | 0.147    | 0.575      |
| Residuals                         | 0.211          | 26 | 0.008       |        |                  |          |            |

Supplementary Table 12: Post Hoc Comparisons - Volatility  $\times$  Stochasticity for  $s$

| Vol, Stoch | Vol, Stoch | Mean Difference | 95% CI for Mean Difference |       | SE    | t      | P <sub>bonf</sub> |
|------------|------------|-----------------|----------------------------|-------|-------|--------|-------------------|
|            |            |                 | Lower                      | Upper |       |        |                   |
| High, High | Low, High  | 0.192           | 0.124                      | 0.260 | 0.025 | 7.735  | < <b>0.001</b> *  |
|            | High, Low  | 0.260           | 0.184                      | 0.337 | 0.028 | 9.396  | < <b>0.001</b> *  |
|            | Low, Low   | 0.247           | 0.170                      | 0.324 | 0.028 | 8.826  | < <b>0.001</b> *  |
| Low, High  | High, Low  | 0.069           | -0.008                     | 0.146 | 0.028 | 2.462  | 0.104             |
|            | Low, Low   | 0.055           | -0.021                     | 0.131 | 0.028 | 1.989  | 0.313             |
| High, Low  | Low, Low   | -0.014          | -0.082                     | 0.054 | 0.025 | -0.553 | 1.000             |

Supplementary Table 13: Within subjects effects from repeated-measures ANOVA for  $v$

| Effect                            | Sum of Squares | df | Mean Square | F     | p     | $\eta^2$ | $\eta_p^2$ |
|-----------------------------------|----------------|----|-------------|-------|-------|----------|------------|
| Volatility                        | 5.388          | 1  | 5.388       | 3.260 | 0.083 | 0.035    | 0.111      |
| Residuals                         | 42.976         | 26 | 1.653       |       |       |          |            |
| Stochasticity                     | 4.842          | 1  | 4.842       | 3.533 | 0.071 | 0.032    | 0.120      |
| Residuals                         | 35.633         | 26 | 1.371       |       |       |          |            |
| Volatility $\times$ Stochasticity | 1.017          | 1  | 1.017       | 0.425 | 0.520 | 0.007    | 0.016      |
| Residuals                         | 62.236         | 26 | 2.394       |       |       |          |            |

Supplementary Table 14: Within subjects effects from repeated-measures ANOVA for  $\xi$ 

| Effect                            | Sum of Squares | df | Mean Square | F     | p             | $\eta^2$     | $\eta_p^2$ |
|-----------------------------------|----------------|----|-------------|-------|---------------|--------------|------------|
| Volatility                        | 22.595         | 1  | 22.595      | 5.079 | <b>0.033*</b> | 0.066        | 0.163      |
| Residuals                         | 115.666        | 26 | 4.449       |       |               |              |            |
| Stochasticity                     | 0.694          | 1  | 0.694       | 0.182 | 0.673         | 0.002        | 0.007      |
| Residuals                         | 98.959         | 26 | 3.806       |       |               |              |            |
| Volatility $\times$ Stochasticity | 0.129          | 1  | 0.129       | 0.033 | 0.858         | $3.784e - 4$ | 0.001      |
| Residuals                         | 102.589        | 26 | 3.946       |       |               |              |            |

Supplementary Table 15: Within subjects effects from repeated-measures ANOVA for  $E^0$ 

| Effect                            | Sum of Squares | df | Mean Square | F     | p     | $\eta^2$ | $\eta_p^2$ |
|-----------------------------------|----------------|----|-------------|-------|-------|----------|------------|
| Volatility                        | 413.996        | 1  | 413.996     | 0.496 | 0.487 | 0.008    | 0.019      |
| Residuals                         | 21679.787      | 26 | 833.838     |       |       |          |            |
| Stochasticity                     | 427.569        | 1  | 427.569     | 0.718 | 0.405 | 0.008    | 0.027      |
| Residuals                         | 15488.151      | 26 | 595.698     |       |       |          |            |
| Volatility $\times$ Stochasticity | 350.496        | 1  | 350.496     | 0.669 | 0.421 | 0.007    | 0.025      |
| Residuals                         | 13619.554      | 26 | 523.829     |       |       |          |            |

Supplementary Table 16: Within subjects effects from repeated-measures ANOVA for  $w^0$ 

| Effect                            | Sum of Squares | df | Mean Square  | F        | p                  | $\eta^2$ | $\eta_p^2$ |
|-----------------------------------|----------------|----|--------------|----------|--------------------|----------|------------|
| Volatility                        | 0.010          | 1  | 0.010        | 14.483   | <b>&lt; 0.001*</b> | 0.003    | 0.358      |
| Residuals                         | 0.017          | 26 | $6.626e - 4$ |          |                    |          |            |
| Stochasticity                     | 0.292          | 1  | 0.292        | 836.729  | <b>&lt; 0.001*</b> | 0.083    | 0.970      |
| Residuals                         | 0.009          | 26 | $3.489e - 4$ |          |                    |          |            |
| Volatility $\times$ Stochasticity | 3.174          | 1  | 3.174        | 5275.367 | <b>&lt; 0.001*</b> | 0.902    | 0.995      |
| Residuals                         | 0.016          | 26 | $6.016e - 4$ |          |                    |          |            |

Supplementary Table 17: Post Hoc Comparisons - Volatility  $\times$  Stochasticity for  $w^0$ 

| Vol, Stoch | Vol, Stoch | Mean Difference | 95% CI for Mean Difference |        | SE    | t       | P <sub>bonf</sub>  |
|------------|------------|-----------------|----------------------------|--------|-------|---------|--------------------|
|            |            |                 | Lower                      | Upper  |       |         |                    |
| High, High | Low, High  | 0.362           | 0.343                      | 0.380  | 0.007 | 52.859  | <b>&lt; 0.001*</b> |
|            | High, Low  | 0.239           | 0.223                      | 0.255  | 0.006 | 40.259  | <b>&lt; 0.001*</b> |
|            | Low, Low   | -0.085          | -0.102                     | -0.068 | 0.006 | -13.908 | <b>&lt; 0.001*</b> |
| Low, High  | High, Low  | -0.123          | -0.140                     | -0.106 | 0.006 | -20.068 | <b>&lt; 0.001*</b> |
|            | Low, Low   | -0.447          | -0.463                     | -0.431 | 0.006 | -75.309 | <b>&lt; 0.001*</b> |
| High, Low  | Low, Low   | -0.324          | -0.343                     | -0.305 | 0.007 | -47.348 | <b>&lt; 0.001*</b> |

Supplementary Table 18: Within subjects effects from repeated-measures ANOVA for  $C$ 

| Effect                            | Sum of Squares | df | Mean Square | F      | p                  | $\eta^2$ | $\eta_p^2$ |
|-----------------------------------|----------------|----|-------------|--------|--------------------|----------|------------|
| Volatility                        | 209.573        | 1  | 209.573     | 53.206 | <b>&lt; 0.001*</b> | 0.238    | 0.672      |
| Residuals                         | 102.412        | 26 | 3.939       |        |                    |          |            |
| Stochasticity                     | 7.556          | 1  | 7.556       | 2.869  | 0.102              | 0.009    | 0.099      |
| Residuals                         | 68.476         | 26 | 2.634       |        |                    |          |            |
| Volatility $\times$ Stochasticity | 373.366        | 1  | 373.366     | 81.258 | <b>&lt; 0.001*</b> | 0.424    | 0.758      |
| Residuals                         | 119.466        | 26 | 4.595       |        |                    |          |            |

Supplementary Table 19: Post Hoc Comparisons - Volatility  $\times$  Stochasticity for  $C$ 

| Vol, Stoch | Vol, Stoch | Mean Difference | 95% CI for Mean Difference |        | SE    | t       | $P_{bonf}$       |
|------------|------------|-----------------|----------------------------|--------|-------|---------|------------------|
|            |            |                 | Lower                      | Upper  |       |         |                  |
| High, High | Low, High  | 0.933           | -0.610                     | 2.475  | 0.562 | 1.659   | 0.619            |
|            | High, Low  | 4.248           | 2.824                      | 5.671  | 0.517 | 8.209   | < <b>0.001</b> * |
|            | Low, Low   | -2.257          | -3.612                     | -0.902 | 0.493 | -4.575  | < <b>0.001</b> * |
| Low, High  | High, Low  | 3.315           | 1.960                      | 4.670  | 0.493 | 6.719   | < <b>0.001</b> * |
|            | Low, Low   | -3.190          | -4.613                     | -1.766 | 0.517 | -6.165  | < <b>0.001</b> * |
| High, Low  | Low, Low   | -6.505          | -8.047                     | -4.962 | 0.562 | -11.570 | < <b>0.001</b> * |

Supplementary Table 20: Within subjects effects from repeated-measures ANOVA for  $\alpha^f$ 

| Effect                            | Sum of Squares | df | Mean Square | F     | p     | $\eta^2$     | $\eta_p^2$ |
|-----------------------------------|----------------|----|-------------|-------|-------|--------------|------------|
| Volatility                        | 0.007          | 1  | 0.007       | 0.183 | 0.672 | 0.002        | 0.007      |
| Residuals                         | 1.019          | 26 | 0.039       |       |       |              |            |
| Stochasticity                     | 0.119          | 1  | 0.119       | 3.216 | 0.085 | 0.031        | 0.110      |
| Residuals                         | 0.963          | 26 | 0.037       |       |       |              |            |
| Volatility $\times$ Stochasticity | 0.003          | 1  | 0.003       | 0.039 | 0.845 | $6.706e - 4$ | 0.002      |
| Residuals                         | 1.697          | 26 | 0.065       |       |       |              |            |

Supplementary Table 21: Within subjects effects from repeated-measures ANOVA for  $\gamma^f$ 

| Effect                            | Sum of Squares | df | Mean Square  | F     | p     | $\eta^2$     | $\eta_p^2$ |
|-----------------------------------|----------------|----|--------------|-------|-------|--------------|------------|
| Volatility                        | 0.018          | 1  | 0.018        | 0.956 | 0.337 | 0.011        | 0.035      |
| Residuals                         | 0.488          | 26 | 0.019        |       |       |              |            |
| Stochasticity                     | $7.475e - 4$   | 1  | $7.475e - 4$ | 0.043 | 0.837 | $4.448e - 4$ | 0.002      |
| Residuals                         | 0.447          | 26 | 0.017        |       |       |              |            |
| Volatility $\times$ Stochasticity | 0.044          | 1  | 0.044        | 1.694 | 0.204 | 0.026        | 0.061      |
| Residuals                         | 0.682          | 26 | 0.026        |       |       |              |            |

Supplementary Table 22: Within subjects effects from repeated-measures ANOVA for  $w^f$ 

| Effect                            | Sum of Squares | df | Mean Square | F     | p     | $\eta^2$ | $\eta_p^2$ |
|-----------------------------------|----------------|----|-------------|-------|-------|----------|------------|
| Volatility                        | 3.399          | 1  | 3.399       | 2.040 | 0.165 | 0.023    | 0.073      |
| Residuals                         | 43.321         | 26 | 1.666       |       |       |          |            |
| Stochasticity                     | 4.267          | 1  | 4.267       | 3.153 | 0.088 | 0.029    | 0.108      |
| Residuals                         | 35.193         | 26 | 1.354       |       |       |          |            |
| Volatility $\times$ Stochasticity | 1.145          | 1  | 1.145       | 0.477 | 0.496 | 0.008    | 0.018      |
| Residuals                         | 62.373         | 26 | 2.399       |       |       |          |            |

Supplementary Table 23: Within subjects effects from repeated-measures ANOVA for  $\bar{\alpha}$ 

| Effect                            | Sum of Squares | df | Mean Square | F     | p     | $\eta^2$ | $\eta_p^2$ |
|-----------------------------------|----------------|----|-------------|-------|-------|----------|------------|
| Volatility                        | 0.008          | 1  | 0.008       | 0.198 | 0.660 | 0.002    | 0.008      |
| Residuals                         | 1.000          | 26 | 0.038       |       |       |          |            |
| Stochasticity                     | 0.120          | 1  | 0.120       | 3.245 | 0.083 | 0.032    | 0.111      |
| Residuals                         | 0.963          | 26 | 0.037       |       |       |          |            |
| Volatility $\times$ Stochasticity | 0.004          | 1  | 0.004       | 0.065 | 0.801 | 0.001    | 0.002      |
| Residuals                         | 1.688          | 26 | 0.065       |       |       |          |            |



Supplementary Table 24: Within subjects effects from repeated-measures ANOVA for  $\bar{\gamma}$ 

| Effect                            | Sum of Squares | df | Mean Square  | F     | p     | $\eta^2$     | $\eta_p^2$ |
|-----------------------------------|----------------|----|--------------|-------|-------|--------------|------------|
| Volatility                        | 0.018          | 1  | 0.018        | 0.955 | 0.337 | 0.011        | 0.035      |
| Residuals                         | 0.483          | 26 | 0.019        |       |       |              |            |
| Stochasticity                     | $6.263e - 4$   | 1  | $6.263e - 4$ | 0.037 | 0.850 | $3.753e - 4$ | 0.001      |
| Residuals                         | 0.446          | 26 | 0.017        |       |       |              |            |
| Volatility $\times$ Stochasticity | 0.047          | 1  | 0.047        | 1.816 | 0.189 | 0.028        | 0.065      |
| Residuals                         | 0.674          | 26 | 0.026        |       |       |              |            |

## 2 Supplement to Experiment 2

### 2.1 Participants

Participants completed a number of clinical and psychological questionnaires during the screening process. These included the Keele STarT Back Screening Tool (STarT), the State-Trait Anxiety Inventory (STAI), the Pain Anxiety Symptoms Scale (PASS-20), Patient Health Questionnaire-9 (PHQ-9) for depression, Pain Catastrophizing Scale (PCS), and the Brief Pain Inventory (BPI) interference and severity components. As chronic pain is often comorbid with the above disorders - which are associated with altered cognitive function - control participants with low scores were selected to simplify the comparison between participant groups. Supplementary Table 25 shows that the controls had significantly lower questionnaire scores compared to the back pain participants.

Supplementary Table 25: Participant questionnaire scores for the back pain and control groups. The table shows the mean score and standard error (SE) for the Keele STarT Back Screening Tool (STarT), the State-Trait Anxiety Inventory (STAI), the Pain Anxiety Symptoms Scale (PASS-20), Patient Health Questionnaire-9 (PHQ-9) for depression, Pain Catastrophizing Scale (PCS), and the Brief Pain Inventory (BPI) interference and severity components. The Bayes Factor ( $BF_{10}$ ) for the Bayesian independent samples T-tests comparing the back pain and control group scores are also shown.

| Questionnaire      | Back Pain |        | Controls |        | $BF_{10}$              |
|--------------------|-----------|--------|----------|--------|------------------------|
|                    | Mean      | SE     | Mean     | SE     |                        |
| STarT              | 5.660     | 1.552  | 0.655    | 0.865  | $2.305 \times 10^{36}$ |
| STAI               | 52.786    | 11.736 | 31.345   | 31.345 | $7.887 \times 10^{18}$ |
| PASS-20            | 60.911    | 18.236 | 30.164   | 19.755 | $5.600 \times 10^{10}$ |
| PHQ-9              | 12.589    | 5.917  | 1.945    | 2.206  | $3.338 \times 10^{19}$ |
| PCS                | 28.768    | 14.304 | 6.164    | 7.408  | $8.315 \times 10^{14}$ |
| BPI (severity)     | 4.902     | 1.767  | 1.841    | 1.071  | $1.660 \times 10^{16}$ |
| BPI (interference) | 5.050     | 2.346  | 1.023    | 1.787  | $2.121 \times 10^{14}$ |

### 2.2 Behavioural Results

We superimposed participants' share price predictions on the game sequences for the back pain group Supplementary Fig. 10 and controls Supplementary Fig. 12. Supplementary Fig. 11 and 13 display their confidence ratings throughout the game for the back pain and control groups respectively.



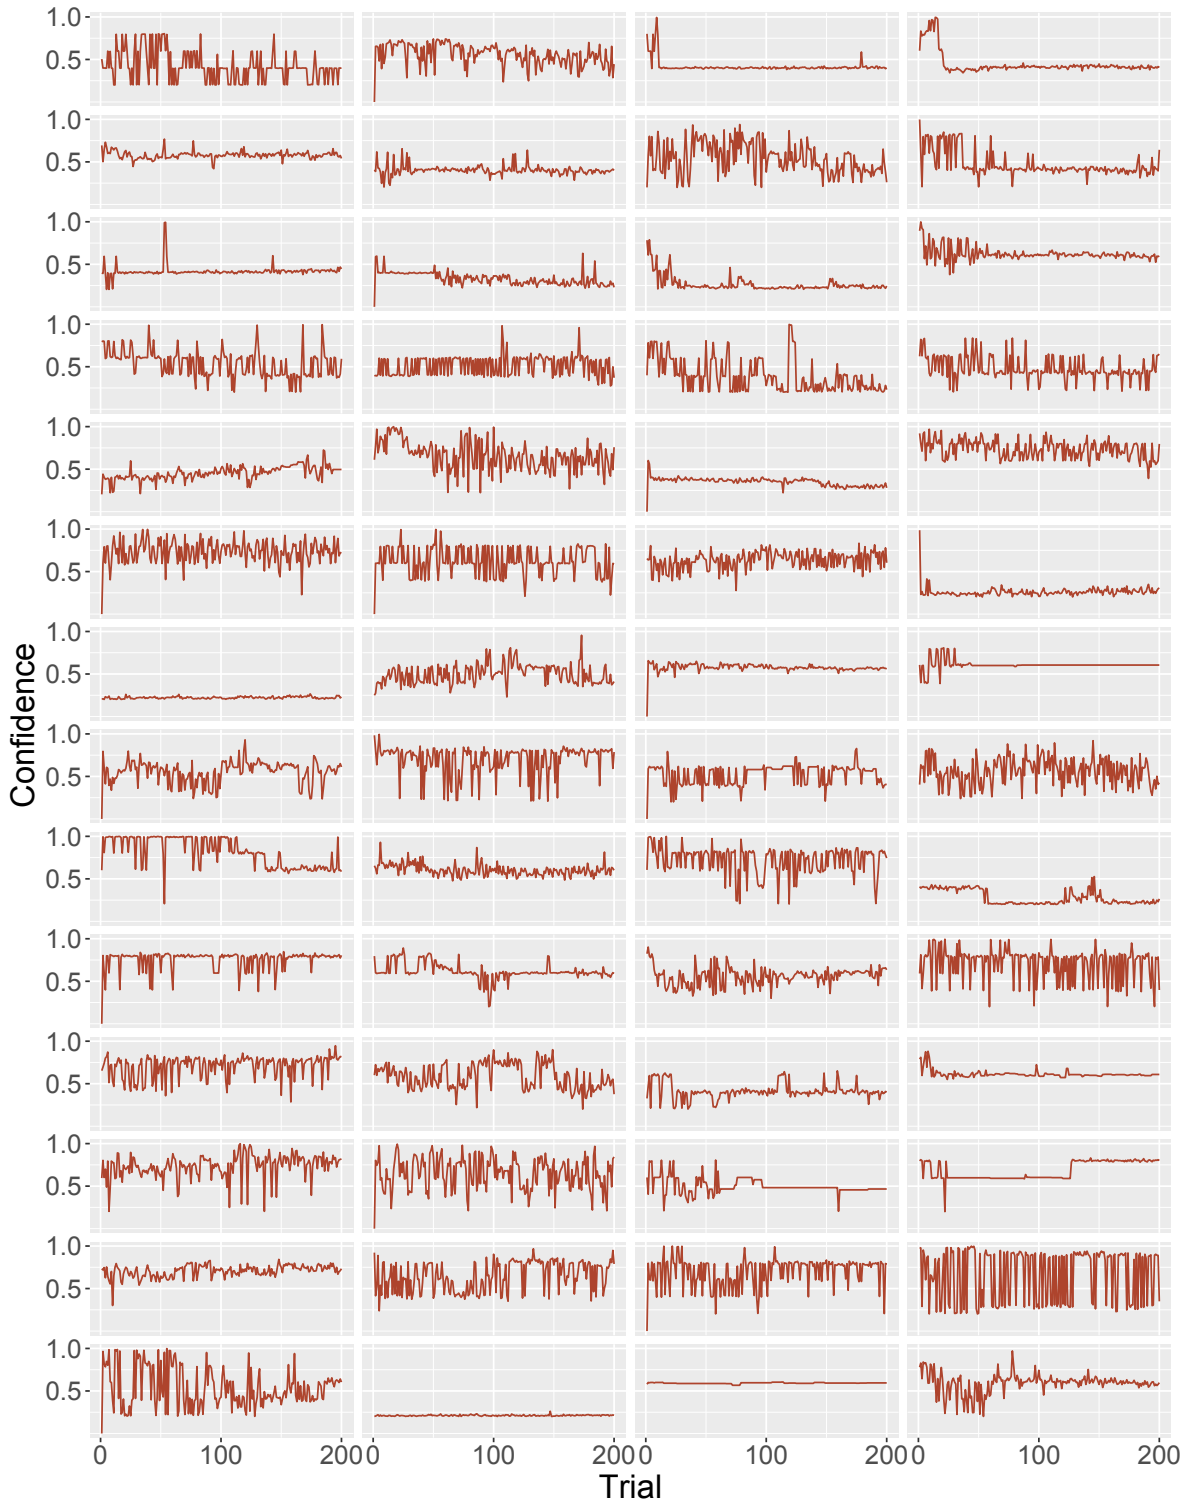

Supplementary Fig. 11: Back pain group participants confidence ratings over the 200 trials of the stock market game.

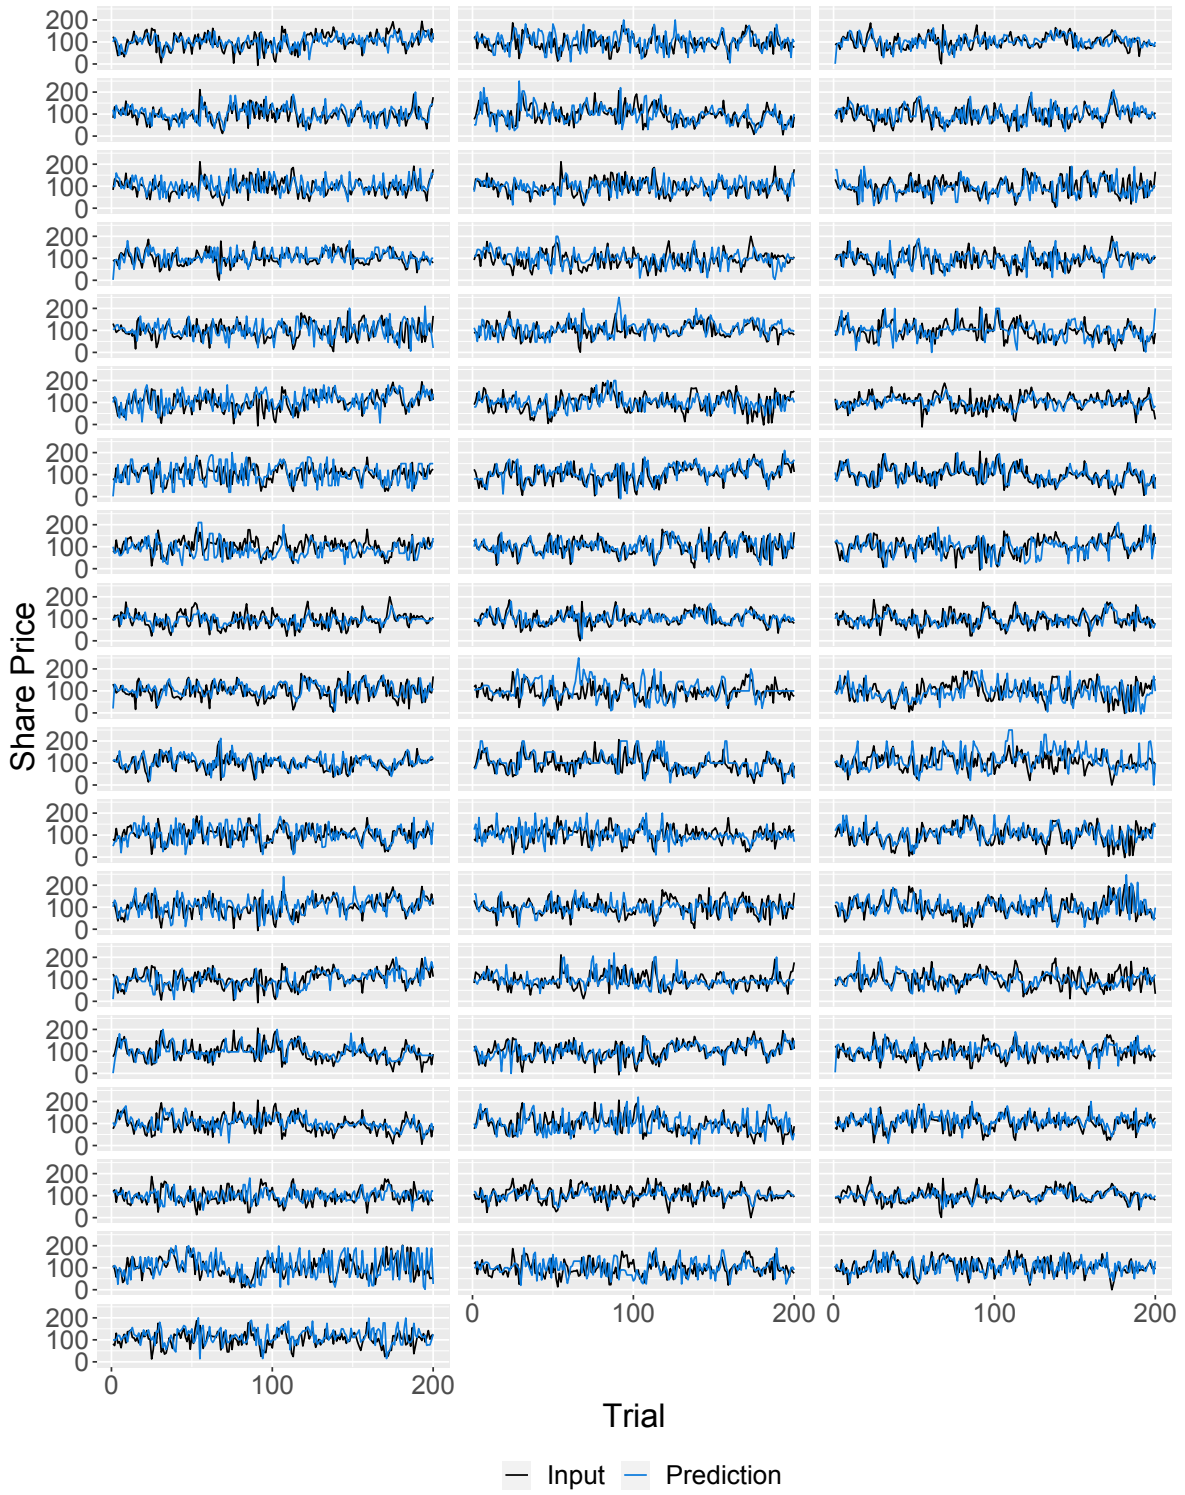

Supplementary Fig. 12: Control participant predictions (blue) and the input game sequence (black) over the 200 trials of the stock market game.

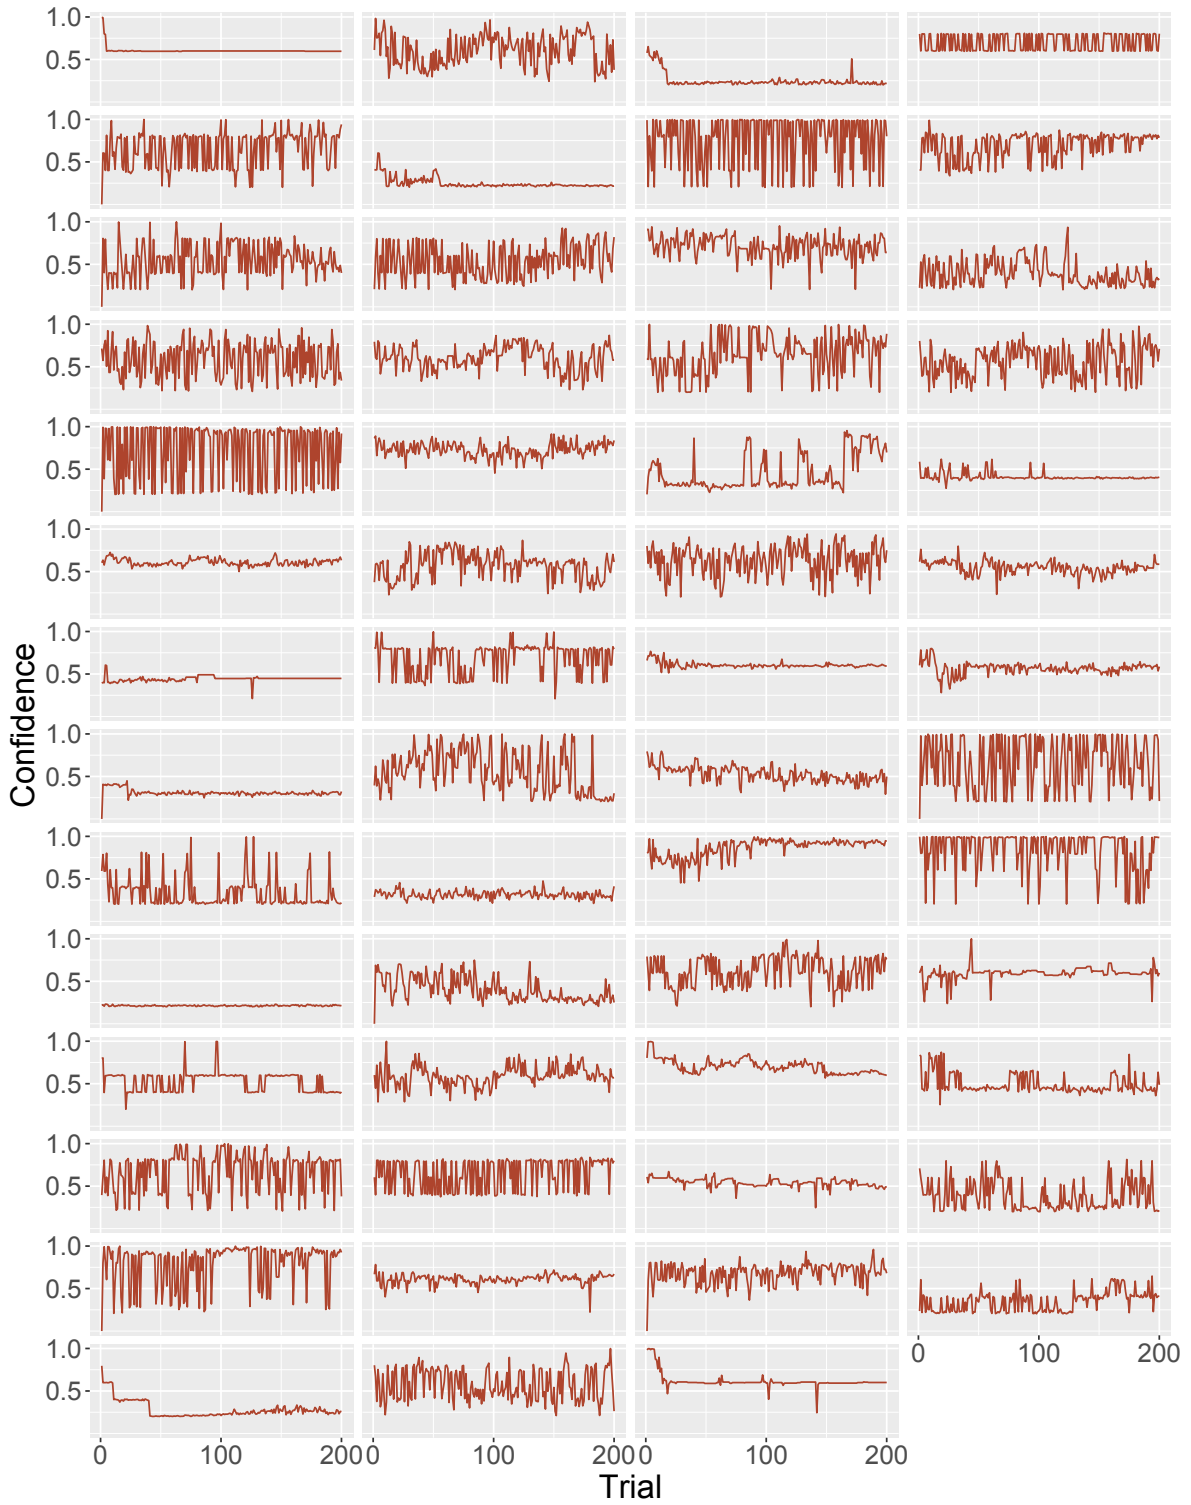

Supplementary Fig. 13: Control group participants confidence ratings over the 200 trials of the stock market game.

### 2.3 Correlation between model predictions and participant responses

For each participant we plotted the RL and KF model predictions against the participant responses in Supplementary Fig. 14. The grand mean correlations across participants for each model and participant group was calculated and included in the figure.

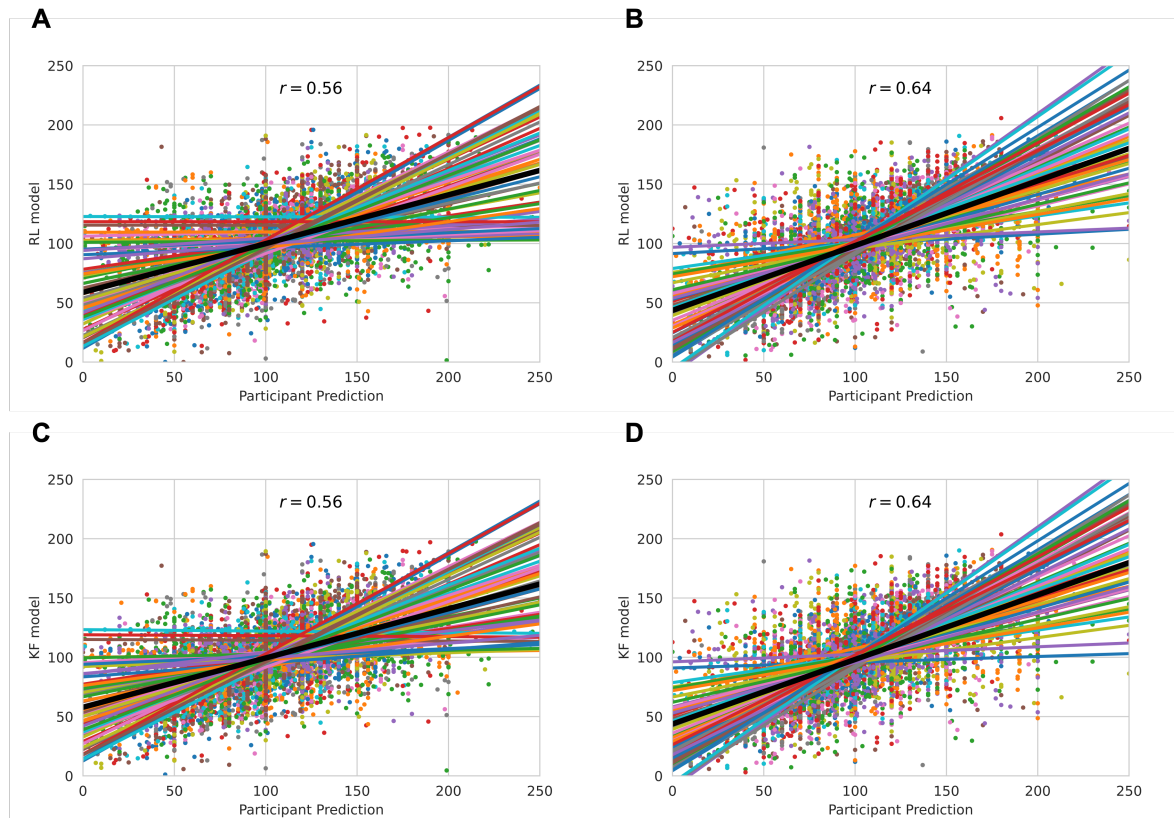

Supplementary Fig. 14: Model predictions against participant responses for **A-B**: the RL model and **C-D**: the KF model. **A**, **C**: back pain group; **B**, **D**: controls. The annotated value is the grand mean correlation across subjects for each model and participant group.

### 2.4 Parameter Recovery

The results from the parameter recovery analysis for the RL, KF and random models are displayed in Supplementary Table 26-28. We recovered each parameter 50 times and calculated mean and SD of the correlation between the true and recovered parameter values.

Supplementary Table 26: Pearson correlation coefficient  $r$  (SD) from the parameter recovery analysis from each model for the RL

|          | $\alpha$      | $\xi$         | $E_0$         | $C$           |
|----------|---------------|---------------|---------------|---------------|
| $r$ (SD) | 0.936 (0.139) | 0.934 (0.223) | 0.800 (0.149) | 0.654 (0.122) |

### 2.5 Model Recovery

We also ran a model recovery analysis as described in the Methods. The confusion matrix of our analysis based on 50 simulations is shown in Supplementary Table 29.

Supplementary Table 27: Pearson correlation coefficient  $r$  (SD) from the parameter recovery analysis from each model for the KF

|        | $v$           | $s$           | $\xi$         | $w_0$         | $E_0$         | $C$           |
|--------|---------------|---------------|---------------|---------------|---------------|---------------|
| r (SD) | 0.573 (0.147) | 0.546 (0.181) | 0.960 (0.132) | 0.303 (0.128) | 0.727 (0.102) | 0.608 (0.201) |

Supplementary Table 28: Pearson correlation coefficient  $r$  (SD) from the parameter recovery analysis from each model for the random model

|        | $\xi$         | $E_0$         | $C$           |
|--------|---------------|---------------|---------------|
| r (SD) | 0.959 (0.153) | 0.964 (0.131) | 0.601 (0.119) |

Supplementary Table 29: Confusion matrix from the model recovery analysis based on 50 simulations. The y-axis indicates which model simulated the dataset, while the x-axis indicates which model fit the data.

|           |        | RL    | KF    | Random |
|-----------|--------|-------|-------|--------|
| Simulated | RL     | 0.688 | 0.250 | 0.062  |
|           | KF     | 0.540 | 0.420 | 0.040  |
|           | Random | 0.435 | 0.043 | 0.522  |
|           |        | Fit   |       |        |

## 2.6 Parameter Comparison

### 2.6.1 Group-level parameters

We plotted the estimate posterior distributions for the group level-mean of each parameter of the RL model in Supplementary Fig. 15 and the KF model in Supplementary Fig. 16 and 17. We found that the estimate for group-level mean for the RL learning rate was significantly lower for the back pain group than the controls. We found no other group-level differences between the back pain and control groups for any of the posterior distributions of the parameters.

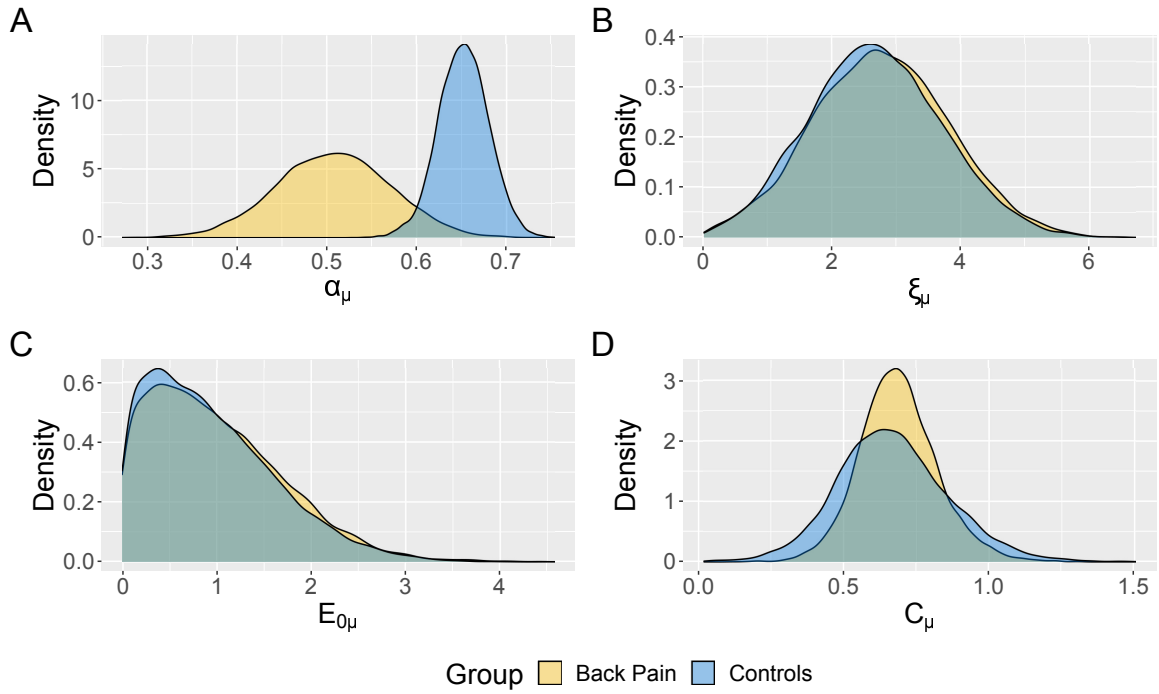

Supplementary Fig. 15: Posterior distribution estimates for the RL model group-level parameters. Back pain (yellow) and controls (blue) posterior estimates for the group-level mean of the **A** learning rate ( $\alpha$ ), **B** prediction noise ( $\xi$ ), **C** initial estimate ( $E_0$ ), **D** confidence scaling factor ( $C$ ) are superimposed.

### 2.6.2 Individual-level parameters

We estimated the individual-level parameters for the back pain and control participant groups. The raincloud plots of the individual parameter estimates are shown for the RL model in Supplementary Fig. 18 and for the KF model in Supplementary Fig. 19.



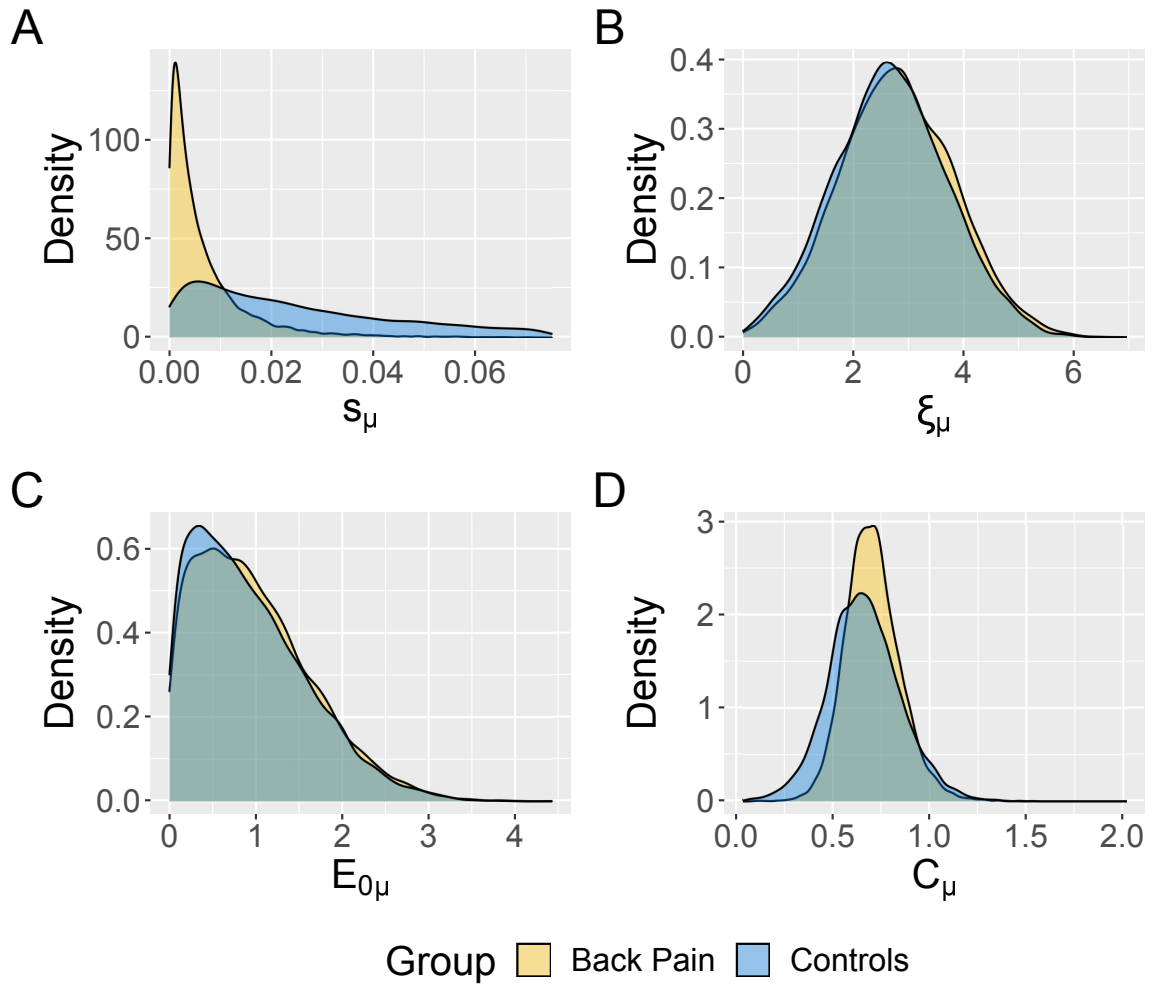

Supplementary Fig. 16: Posterior distribution estimates for the KF model group-level parameters. Back pain (yellow) and controls (blue) posterior estimates for the group-level mean of the **A** stochasticity ( $s$ ), **B** prediction noise ( $\xi$ ), **C** initial estimate ( $E_0$ ), **D** confidence scaling factor ( $C$ ) are superimposed.

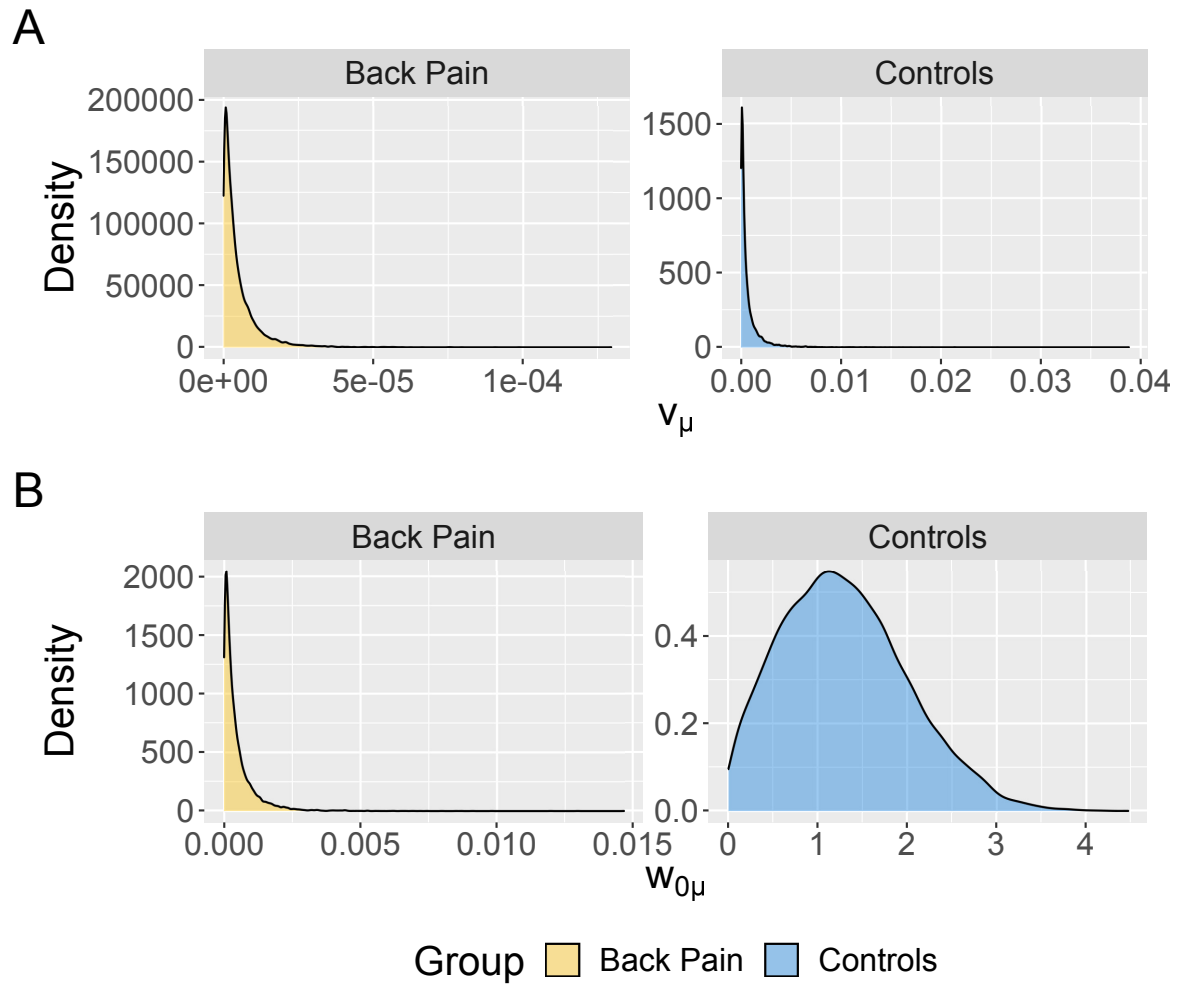

Supplementary Fig. 17: The posterior distribution estimates for the KF model group-level mean **A** volatility ( $v$ ), **B** initial estimate uncertainty ( $w_0$ ). The back pain and control groups' posteriors are displayed on separate graphs for ease of visualisation due to the large difference in scales.

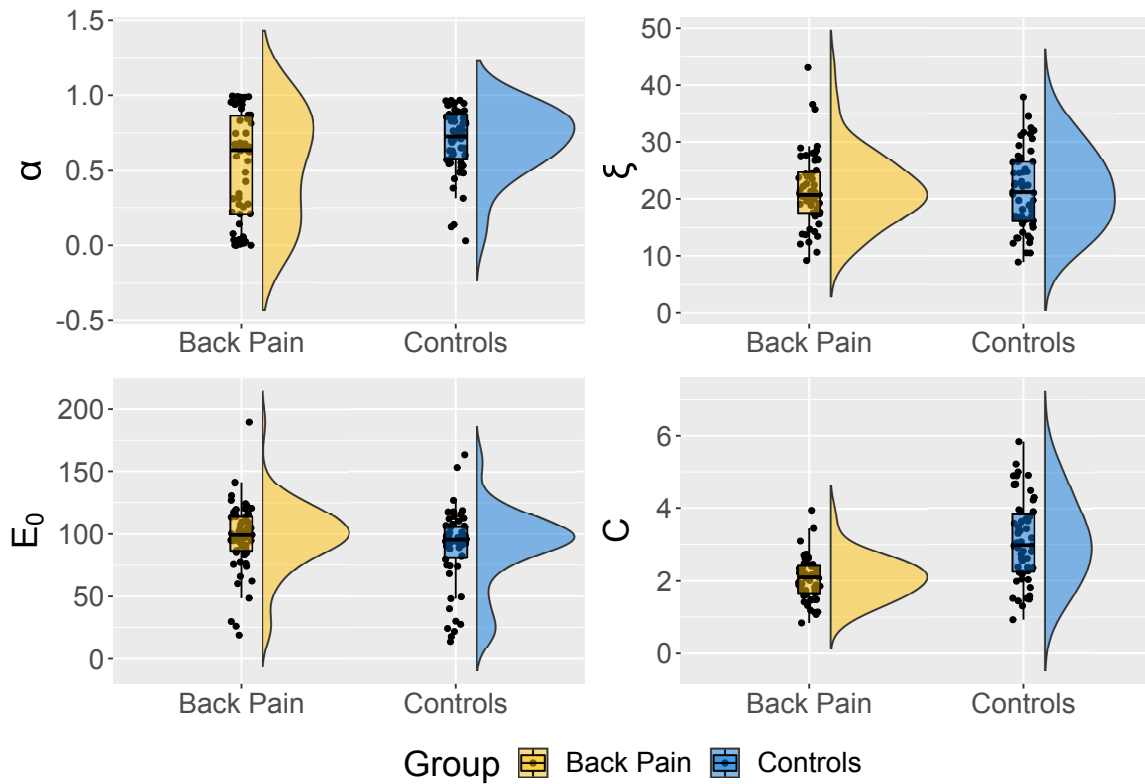

Supplementary Fig. 18: Raincloud plots for the RL model individual-level parameter estimates. Back pain (yellow) and controls (blue) density plots for the learning rate ( $\alpha$ ), prediction noise ( $\xi$ ), initial estimate ( $E_0$ ), confidence scaling factor ( $C$ ) parameter estimates. The black points represent the individual parameter estimates.

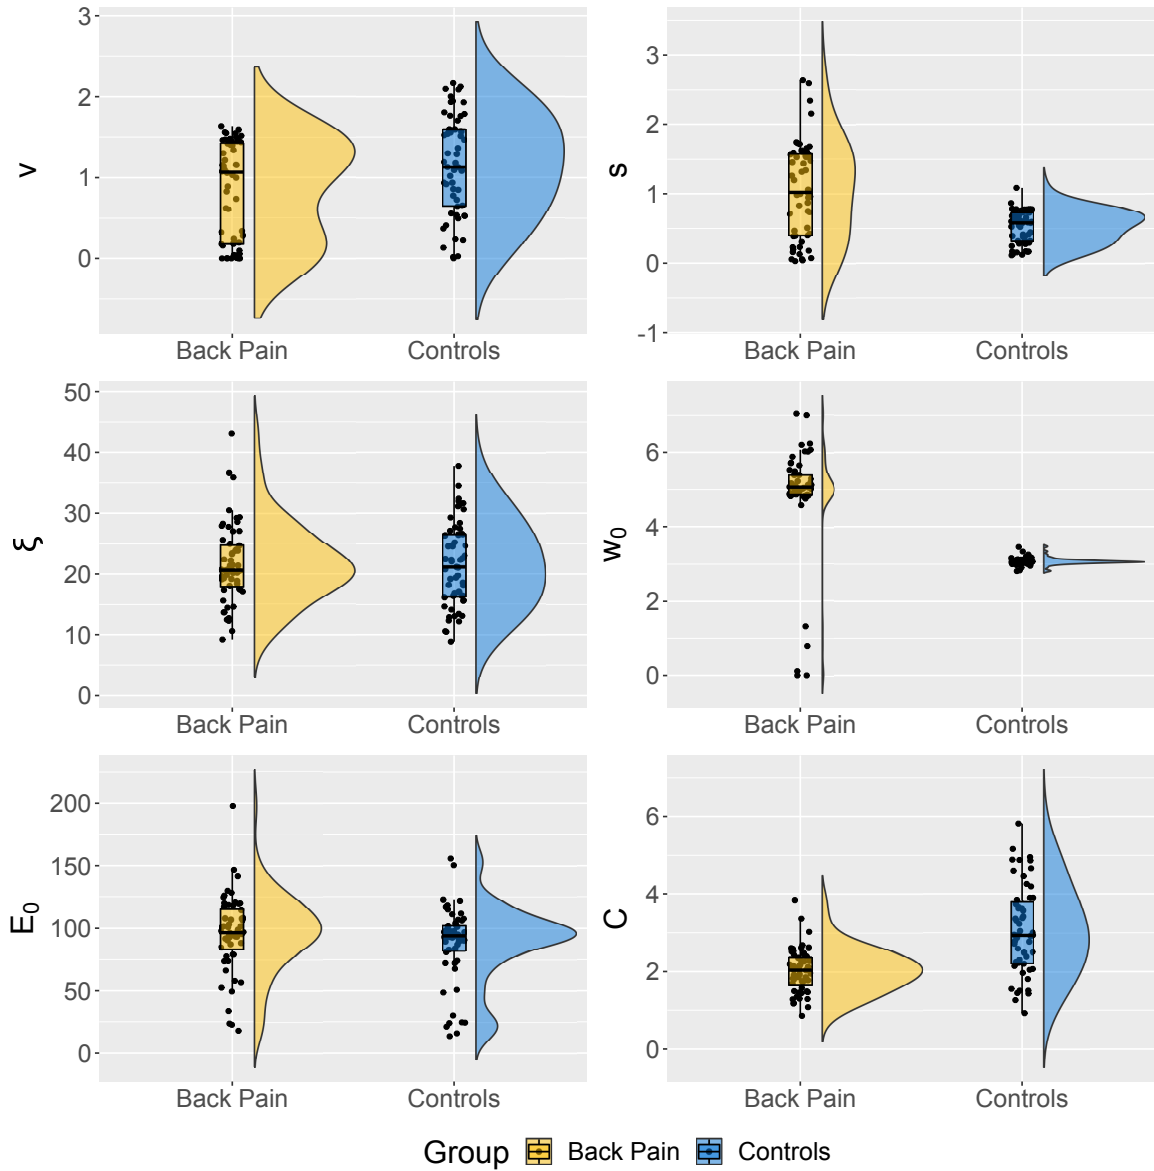

Supplementary Fig. 19: Raincloud plots for the KF model individual-level parameter estimates. Back pain (yellow) and controls (blue) density plots for the volatility ( $v$ ), stochasticity ( $s$ ), prediction noise ( $\xi$ ), initial uncertainty  $w_0$ , initial estimate ( $E_0$ ), confidence scaling factor ( $C$ ) parameter estimates. The black points represent the individual parameter estimates.
